# Supplementary material
Source: Springer Nature journal article supplement (https://www.springermedizin.de/resource/supplementary/13223_2013_410_MOESM3_ESM.pdf/9596618)

**A**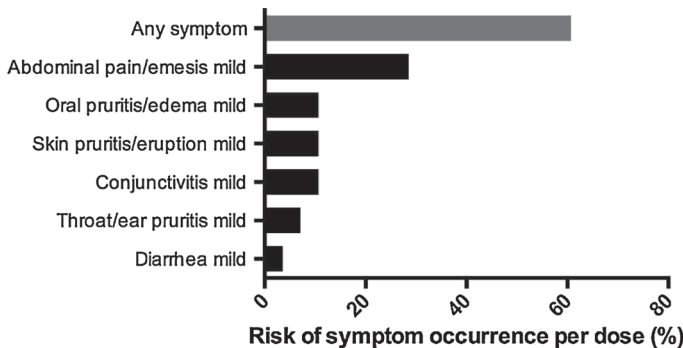**B**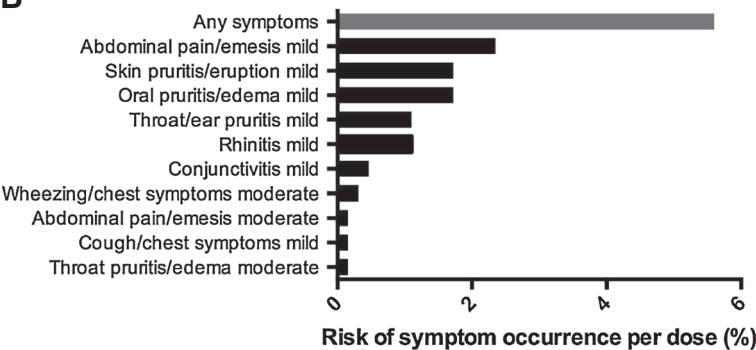**C**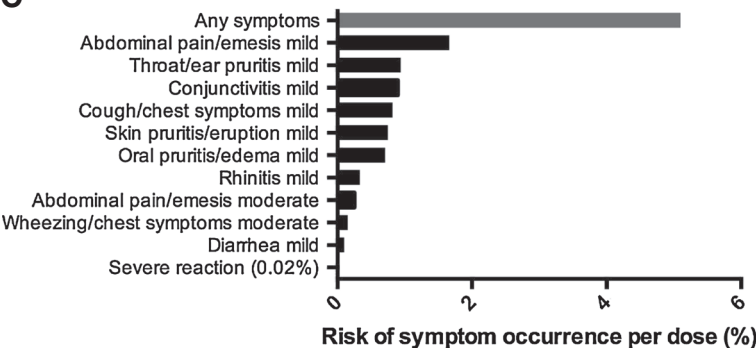

Supplement: MOESM3 [file 9596618]
